# Supplementary material
Source: PubMed Central journal article supplement (PMC6135246)
Supplement: NIHMS939037-supplement-3.pdf [file NIHMS939037-supplement-3.pdf]

Supplementary Table 1. Mean (Standard Deviation) Characteristics of the Respondents to Wave 1 of the Chicago Health, Aging, and Social Relations Study (CHASRS)

|                             | <i>All</i>         | <i>Non-Hispanic<br/>Caucasian</i> | <i>African<br/>American</i> | <i>Hispanic<sup>a</sup></i> |
|-----------------------------|--------------------|-----------------------------------|-----------------------------|-----------------------------|
| Age (yrs)                   | 57.5<br>(4.4)      | 58.2<br>(4.3)                     | 58.2<br>(3.8)               | 55.6<br>(3.7)               |
| Female                      | 52.4%              | 52.4%                             | 54.3%                       | 50.0%                       |
| Ethnicity                   | 100%               | 35.8%                             | 35.4%                       | 28.8%                       |
| Years of Education          | 13.3<br>(3.0)      | 14.6<br>(2.4)                     | 12.8<br>(3.2)               | 12.2<br>(3.1)               |
| Household Income (\$)       | 63,092<br>(46,945) | 80,885<br>(52,711)                | 51,852<br>(41,146)          | 54,308<br>(39,091)          |
| Retirement status - retired | 62.9%              | 58.5%                             | 75.3%                       | 53.0%                       |
| Marital Status              |                    |                                   |                             |                             |
| <i>Married/Cohabiting</i>   | 61.1%              | 74.5%                             | 53.1%                       | 54.6%                       |
| <i>Widowed</i>              | 9.2%               | 7.3%                              | 16.1%                       | 3.0%                        |
| <i>Divorced/Separated</i>   | 24.5%              | 14.6%                             | 25.9%                       | 34.9%                       |
| <i>Never Married</i>        | 5.2%               | 3.7%                              | 4.9%                        | 7.6%                        |
| Self Rated Health           |                    |                                   |                             |                             |
| <i>Poor</i>                 | 1.3%               | 0%                                | 2.5%                        | 1.5%                        |
| <i>Fair</i>                 | 14.9%              | 3.7%                              | 22.8%                       | 20.0%                       |

|                            |               |               |               |                |
|----------------------------|---------------|---------------|---------------|----------------|
| <i>Good</i>                | 43.7%         | 34.6%         | 48.1%         | 47.7%          |
| <i>Very Good</i>           | 31.0%         | 45.7%         | 22.8%         | 23.1%          |
| <i>Excellent</i>           | 9.2%          | 16.1%         | 3.8%          | 7.7%           |
| Functional Limitation      |               |               |               |                |
| <i>Low</i>                 | 27.3%         | 34.6%         | 23.5%         | 23.1%          |
| <i>Medium</i>              | 30.8%         | 30.9%         | 28.4%         | 33.9%          |
| <i>High</i>                | 41.9%         | 34.6%         | 48.2%         | 43.1%          |
| Charlson Comorbidity Index |               |               |               |                |
| <i>Zero</i>                | 69.6%         | 79.3%         | 61.0%         | 67.7%          |
| <i>One</i>                 | 15.6%         | 9.8%          | 22.1%         | 15.4%          |
| <i>Two or more</i>         | 14.7%         | 11.0%         | 16.9%         | 16.9%          |
| Cognitive function         | 16.9<br>(3.3) | 18.7<br>(3.2) | 15.9<br>(3.0) | 16.2<br>(3.0)  |
| Loneliness                 | 36.0<br>(9.8) | 33.9<br>(8.5) | 36.5<br>(9.1) | 38.2<br>(11.6) |
| Social Contacts            | 4.5<br>(1.3)  | 4.9<br>(1.2)  | 4.5<br>(1.4)  | 4.2<br>(1.3)   |
| Sample Size (N)            | 229           | 82            | 81            | 66             |

<sup>a</sup> The majority of these 66 individuals are Mexican (72%), with the remaining individuals representing a wide range of ethnicities (e.g., Puerto Rican, Cuban, Chilean, Columbian, Dominican, etc.)
