# Supplementary material
Source: PubMed Central journal article supplement (PMC6135246)
Supplement: NIHMS939037-supplement-4.pdf [file NIHMS939037-supplement-4.pdf]

Supplementary Table 2. Stepwise Cox regression model results with sociodemographic variables

|                          | <b>Model 1 - Basic Demographics</b> | <b>Model 2 - add Education and Income</b> | <b>Model 3 - Add Retirement status</b> | <b>Model 4 - Add Marital status</b> | <b>Model 5 - Full list of covariates</b> | <b>Model 6 - Final model</b> |
|--------------------------|-------------------------------------|-------------------------------------------|----------------------------------------|-------------------------------------|------------------------------------------|------------------------------|
|                          | <b>B (SE)</b>                       | <b>B (SE)</b>                             | <b>B (SE)</b>                          | <b>B (SE)</b>                       | <b>B (SE)</b>                            | <b>B (SE)</b>                |
| <b>Age</b>               | 0.14 (0.10)                         |                                           |                                        |                                     | <b>0.30 (0.11)*</b>                      | <b>0.30 (0.10)*</b>          |
| <b>Female</b>            | -0.20 (0.19)                        |                                           |                                        |                                     | -0.32 (0.20)                             |                              |
| <b>Ethnicity</b>         |                                     |                                           |                                        |                                     |                                          |                              |
| <b>Black</b>             | 0.01 (0.23)                         | -0.13 (0.24)                              |                                        |                                     | 0.08 (0.25)                              | 0.11 (0.25)                  |
| <b>Hispanic</b>          | <b>0.51 (0.23)*</b>                 | 0.28 (0.23)                               |                                        |                                     | 0.41 (0.25)†                             | 0.45 (0.24)†                 |
| <b>Education</b>         |                                     |                                           |                                        |                                     |                                          |                              |
| <b>HS diploma</b>        |                                     | <b>-0.67 (0.25)*</b>                      | <b>-0.58 (0.25)*</b>                   | <b>-0.59 (0.25)*</b>                | <b>-0.51 (0.25)*</b>                     | <b>-0.51 (0.25)*</b>         |
| <b>College +</b>         |                                     | <b>-0.78 (0.29)*</b>                      | <b>-0.78 (0.29)*</b>                   | <b>-0.82 (0.30)*</b>                | <b>-0.63 (0.30)*</b>                     | <b>-0.59 (0.30)*</b>         |
| <b>Household income</b>  |                                     | <b>-0.20 (0.09)*</b>                      | <b>-0.22 (0.09)*</b>                   | <b>-0.23 (0.10)*</b>                | <b>-0.24 (0.11)*</b>                     | <b>-0.22 (0.10)*</b>         |
| <b>Retirement status</b> |                                     |                                           | <b>-0.97 (0.19)*</b>                   | <b>-0.99 (0.19)*</b>                | <b>-1.22 (0.22)*</b>                     | <b>-1.18 (0.21)*</b>         |
| <b>Marital Status</b>    |                                     |                                           |                                        | 0.07 (0.22)                         | -0.01 (0.23)                             |                              |

\*: < .05; †: < .10
