# Supplementary material
Source: PubMed Central journal article supplement (PMC6135246)
Supplement: NIHMS939037-supplement-6.pdf [file NIHMS939037-supplement-6.pdf]

Supplementary Table 4. Stepwise Cox regression model results with all variables (with latest available values)

|                                                      | Model 0 - Final model from above | Model 1 - add Health items | Model 2 - add Cognitive Function | Model 3 - add Social Function | Model 4 - full list of covariates | Model 5 - updated list of covariates | Model 6 - Final model |
|------------------------------------------------------|----------------------------------|----------------------------|----------------------------------|-------------------------------|-----------------------------------|--------------------------------------|-----------------------|
|                                                      | B (SE)                           | B (SE)                     | B (SE)                           | B (SE)                        | B (SE)                            | B (SE)                               | B (SE)                |
| <b>Age</b>                                           | <b>0.25 (0.10)*</b>              | <b>0.21 (0.10)*</b>        | <b>0.23 (0.10)*</b>              | <b>0.20 (0.11)*</b>           | 0.19 (0.12)                       | 0.17 (0.11)                          | <b>0.21 (0.10)*</b>   |
| <b>Female</b>                                        |                                  |                            |                                  |                               | <b>-0.59 (0.24)*</b>              | <b>-0.50 (0.20)*</b>                 |                       |
| <b>Ethnicity</b>                                     |                                  |                            |                                  |                               |                                   |                                      |                       |
| <b>Black</b>                                         |                                  |                            |                                  |                               | -0.01 (0.27)                      |                                      |                       |
| <b>Hispanic</b>                                      |                                  |                            |                                  |                               | 0.32 (0.27)                       |                                      |                       |
| <b>Education</b>                                     |                                  |                            |                                  |                               |                                   |                                      |                       |
| <b>HS diploma</b>                                    | <b>-0.54 (0.25)*</b>             | <b>-0.60 (0.26)*</b>       | -0.39 (0.25)                     |                               | -0.32 (0.28)                      |                                      |                       |
| <b>College +</b>                                     | <b>-0.69 (0.29)*</b>             | <b>-0.69 (0.31)*</b>       | -0.44 (0.31)                     |                               | -0.30 (0.34)                      |                                      |                       |
| <b>Household income</b>                              | <b>-0.23 (0.10)*</b>             | <b>-0.23 (0.11)*</b>       | <b>-0.17 (0.10)*</b>             | -0.07 (0.10)                  | -0.12 (0.12)                      |                                      |                       |
| <b>Retirement status</b>                             | <b>-1.18 (0.21)*</b>             | <b>-1.08 (0.22)*</b>       | <b>-1.10 (0.21)*</b>             | <b>-1.16 (0.21)*</b>          | <b>-1.17 (0.24)*</b>              | <b>-1.21 (0.22)*</b>                 | <b>-1.13 (0.21)*</b>  |
| <b>Marital Status</b>                                |                                  |                            |                                  |                               | 0.06 (0.25)                       |                                      |                       |
| <b>Self-rated health</b>                             |                                  | 0.05 (0.13)                |                                  |                               | 0.14 (0.13)                       |                                      |                       |
| <b>Functional limitation</b>                         |                                  |                            |                                  |                               |                                   |                                      |                       |
| <b>Mid</b>                                           |                                  | -0.07 (0.28)               |                                  |                               | -0.10 (0.30)                      | 0.03 (0.26)                          |                       |
| <b>High</b>                                          |                                  | 0.21 (0.26)                |                                  |                               | 0.51 (0.28)†                      | 0.45 (0.25)†                         |                       |
| <b>Charlson Index</b>                                |                                  |                            |                                  |                               |                                   |                                      |                       |
| <b>1</b>                                             |                                  | 0.06 (0.29)                |                                  |                               | 0.03 (0.30)                       |                                      |                       |
| <b>2 or more</b>                                     |                                  | 0.22 (0.29)                |                                  |                               | 0.12 (0.30)                       |                                      |                       |
| <b>Cognitive Function</b>                            |                                  |                            | <b>-0.25 (0.07)*</b>             | <b>-0.30 (0.07)*</b>          | <b>-0.35 (0.09)*</b>              | <b>-0.36 (0.07)*</b>                 | <b>-0.32 (0.07)*</b>  |
| <b>Subjective social isolation - UCLA loneliness</b> |                                  |                            |                                  | -0.01 (0.09)                  | -0.05 (0.10)                      |                                      |                       |
| <b>Social Contact</b>                                |                                  |                            |                                  | <b>-0.30 (0.11)*</b>          | <b>-0.27 (0.12)*</b>              | <b>-0.33 (0.10)*</b>                 | <b>-0.34 (0.09)*</b>  |

\*: < .05; †: < .10
